# Supplementary material
Source: bioRxiv or medRxiv preprint supplement (https://www.biorxiv.org/highwire/filestream/2761/field_highwire_adjunct_files/0/010926-1.pdf)
Supplement: Supplementary file [file 010926-1.pdf]

# Supplementary material

Olgert Denas

September 24, 2014

## List of Figures

|    |                                                                                                                                                                                                                                                                                               |    |
|----|-----------------------------------------------------------------------------------------------------------------------------------------------------------------------------------------------------------------------------------------------------------------------------------------------|----|
| 1  | Workflow of data and experiments. . . . .                                                                                                                                                                                                                                                     | 3  |
| 2  | The number of TFos for all human and mouse cell types mapped by each of the considered whole genome alignments . . . . .                                                                                                                                                                      | 4  |
| 3  | For each human celltype-factor pair we tested whether the SeqCons rate (of all TFos how many are SeqCons) is higher than expected by a Binomial test . . . . .                                                                                                                                | 5  |
| 4  | For each mouse celltype-factor pair we tested whether the SeqCons rate (of all TFos how many are SeqCons) is higher than expected by a Binomial test . . . . .                                                                                                                                | 6  |
| 5  | The distribution of <i>mouse</i> mappable TFos across <i>cell types</i> . . . . .                                                                                                                                                                                                             | 7  |
| 6  | The distribution of <i>human</i> mappable TFos across <i>cell types</i> . . . . .                                                                                                                                                                                                             | 8  |
| 7  | The distribution of <i>mouse</i> mappable TFos across <i>transcription factors</i> . . . . .                                                                                                                                                                                                  | 9  |
| 8  | The distribution of <i>human</i> mappable TFos across <i>transcription factors</i> . . . . .                                                                                                                                                                                                  | 10 |
| 9  | The distribution of <i>mouse</i> mappable TFos <i>nucleotides</i> across <i>cell types</i> . . . . .                                                                                                                                                                                          | 11 |
| 10 | The distribution of <i>human</i> mappable TFos <i>nucleotides</i> across <i>cell types</i> . . . . .                                                                                                                                                                                          | 12 |
| 11 | The distribution of <i>mouse</i> mappable TFos <i>nucleotides</i> across <i>transcription factors</i> . . . . .                                                                                                                                                                               | 13 |
| 12 | The distribution of <i>human</i> mappable TFos <i>nucleotides</i> across <i>transcription factors</i> . . . . .                                                                                                                                                                               | 14 |
| 13 | For each celltype-factor pair we tested whether the (log) binding signal over FunctCons or FunctActive elements was significantly different from that over SeqCons elements . . . . .                                                                                                         | 15 |
| 14 | For each celltype-factor pair we tested whether the (log) binding signal over FunctCons or FunctActive elements was significantly different from that over SeqCons elements . . . . .                                                                                                         | 16 |
| 15 | Classification of mappable elements for all three analogous cell types . . . . .                                                                                                                                                                                                              | 17 |
| 16 | Classification of mappable elements for all three analogous cell types . . . . .                                                                                                                                                                                                              | 18 |
| 17 | The plot shows the number of FunctActive elements from a query assay as a function of the subset size . . . . .                                                                                                                                                                               | 19 |
| 18 | The plot shows the number of FunctActive elements from a query assay with respect to a subset of assays from the other species . . . . .                                                                                                                                                      | 20 |
| 19 | We modeled the situation of a set of assays that have no co-association, thus overlap with an exclusive set of TFos on the other species . . . . .                                                                                                                                            | 21 |
| 20 | A mouse Rad21 occupancy site mapped on human chromosome 20. Mapping is guided by the human-mouse whole genome alignments which report 5 insertions in human. We classified this mouse TFos as FunctCons, as its mapped version in human overlapps with Rad21 occupancy sites in K562. . . . . | 22 |

## List of Tables

|   |                                                                                                                                                                           |    |
|---|---------------------------------------------------------------------------------------------------------------------------------------------------------------------------|----|
| 1 | Peak signal statistics by peak classes . . . . .                                                                                                                          | 23 |
| 2 | Analogous cells . . . . .                                                                                                                                                 | 23 |
| 3 | Counts of mappable, functionally active, and total TFos. The table reports both the element count and the coverage in mega bases . . . . .                                | 24 |
| 4 | Number of TFos mapped by each alignment for select assays. An element can be mapped if it overlaps DHS elements and shared human mouse DNA by half of its length. . . . . | 24 |

5 Number of TFos mapped by each alignment for select assays. An element can be mapped if it overlaps DHS elements and shared human mouse DNA by half of its length. Continues ... 25

6 Number of TFos mapped by each alignment for select assays. An element can be mapped if it overlaps DHS elements and shared human mouse DNA by half of its length. 26

# 1 Supplementary figures

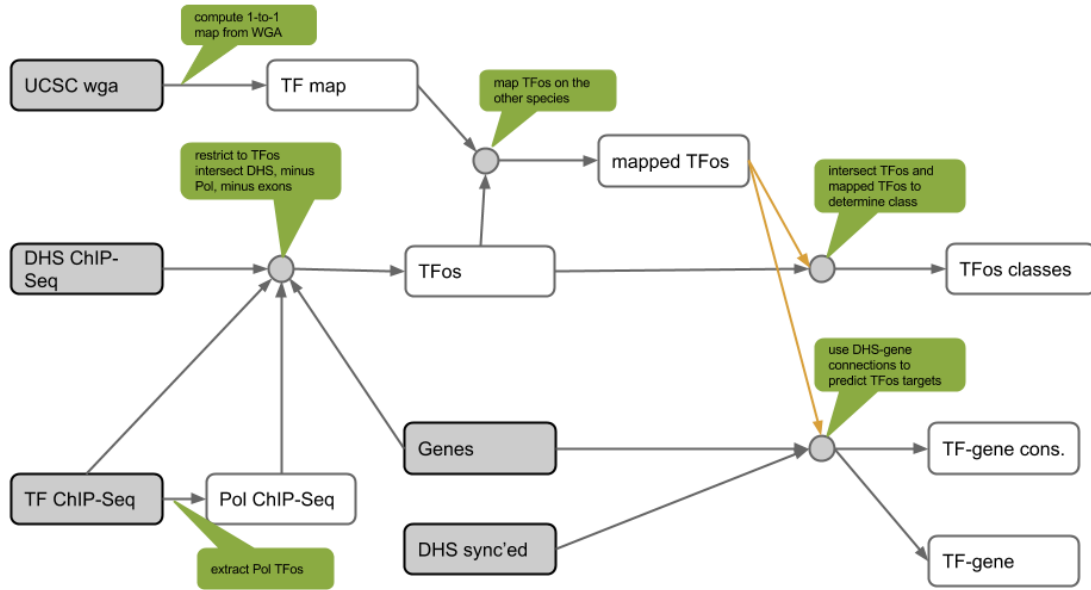

Figure 1: Workflow of data and experiments.

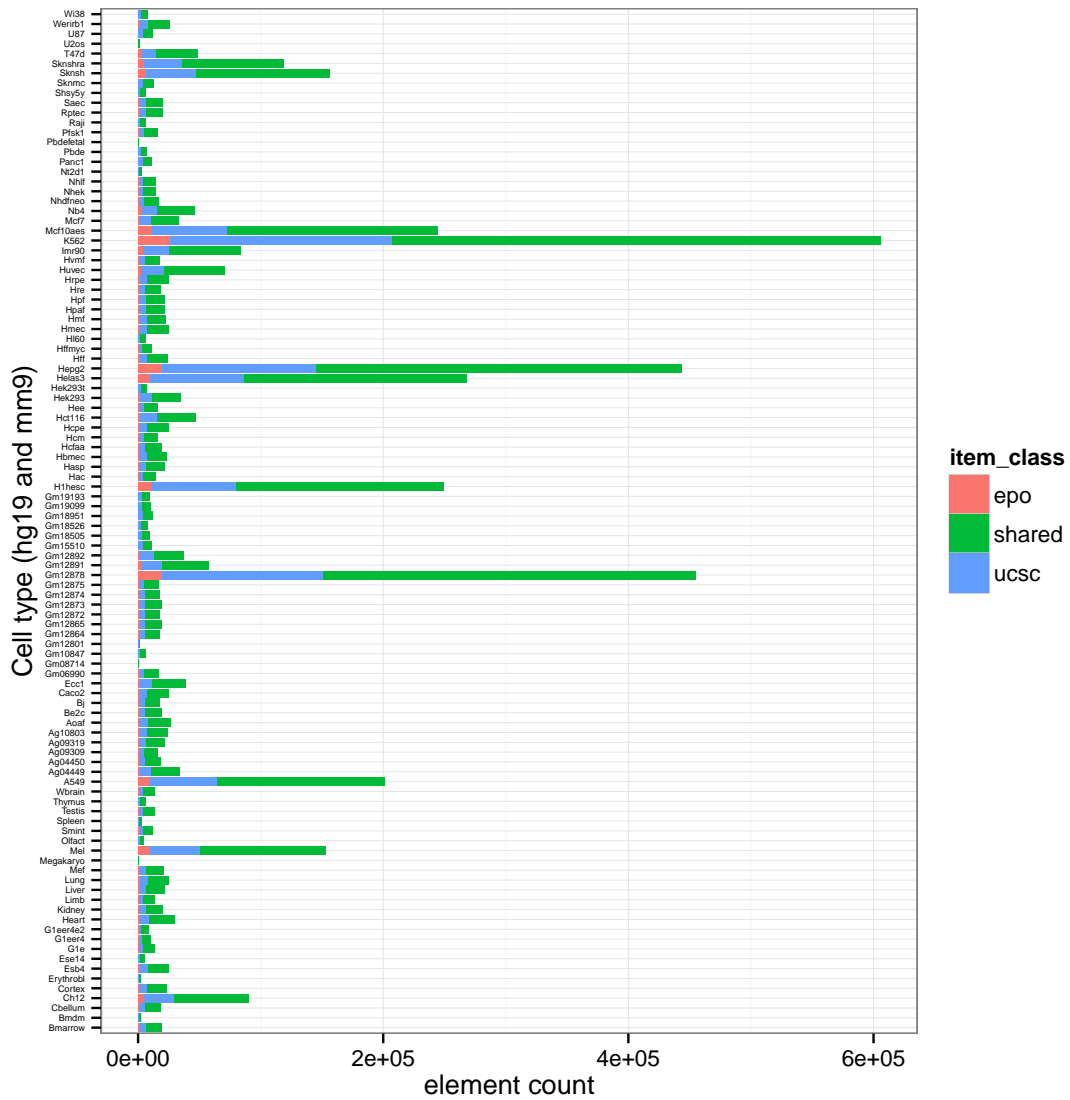

Figure 2: The number of TFos for all human and mouse cell types mapped by each of the considered whole genome alignments. Here we show, only those TFos that overlap by half their length with a DHS peak. See supplementary Table 4 for more details.

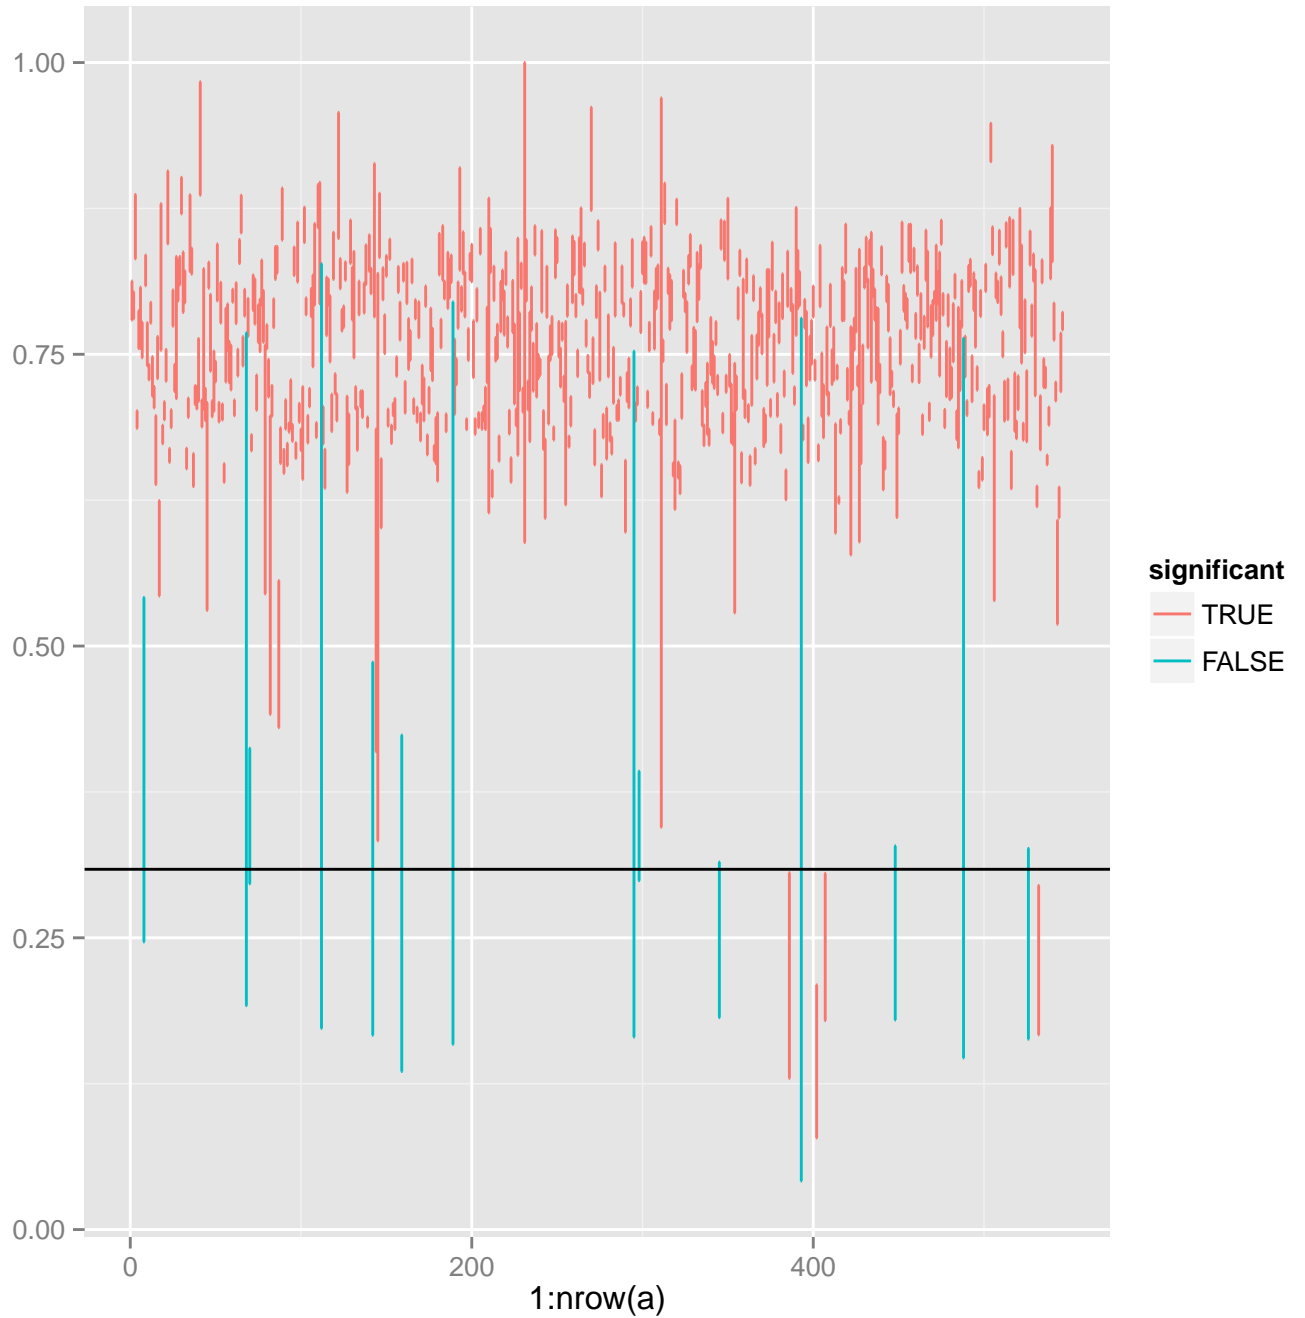

Figure 3: For each human celltype-factor pair we tested whether the SeqCons rate (of all TFos how many are SeqCons) is higher than expected by a Binomial test. The vertical lines show the estimated 99% confidence interval and the black line indicates the expected rate. The color of the vertical lines indicates whether the interval contains the expected value.

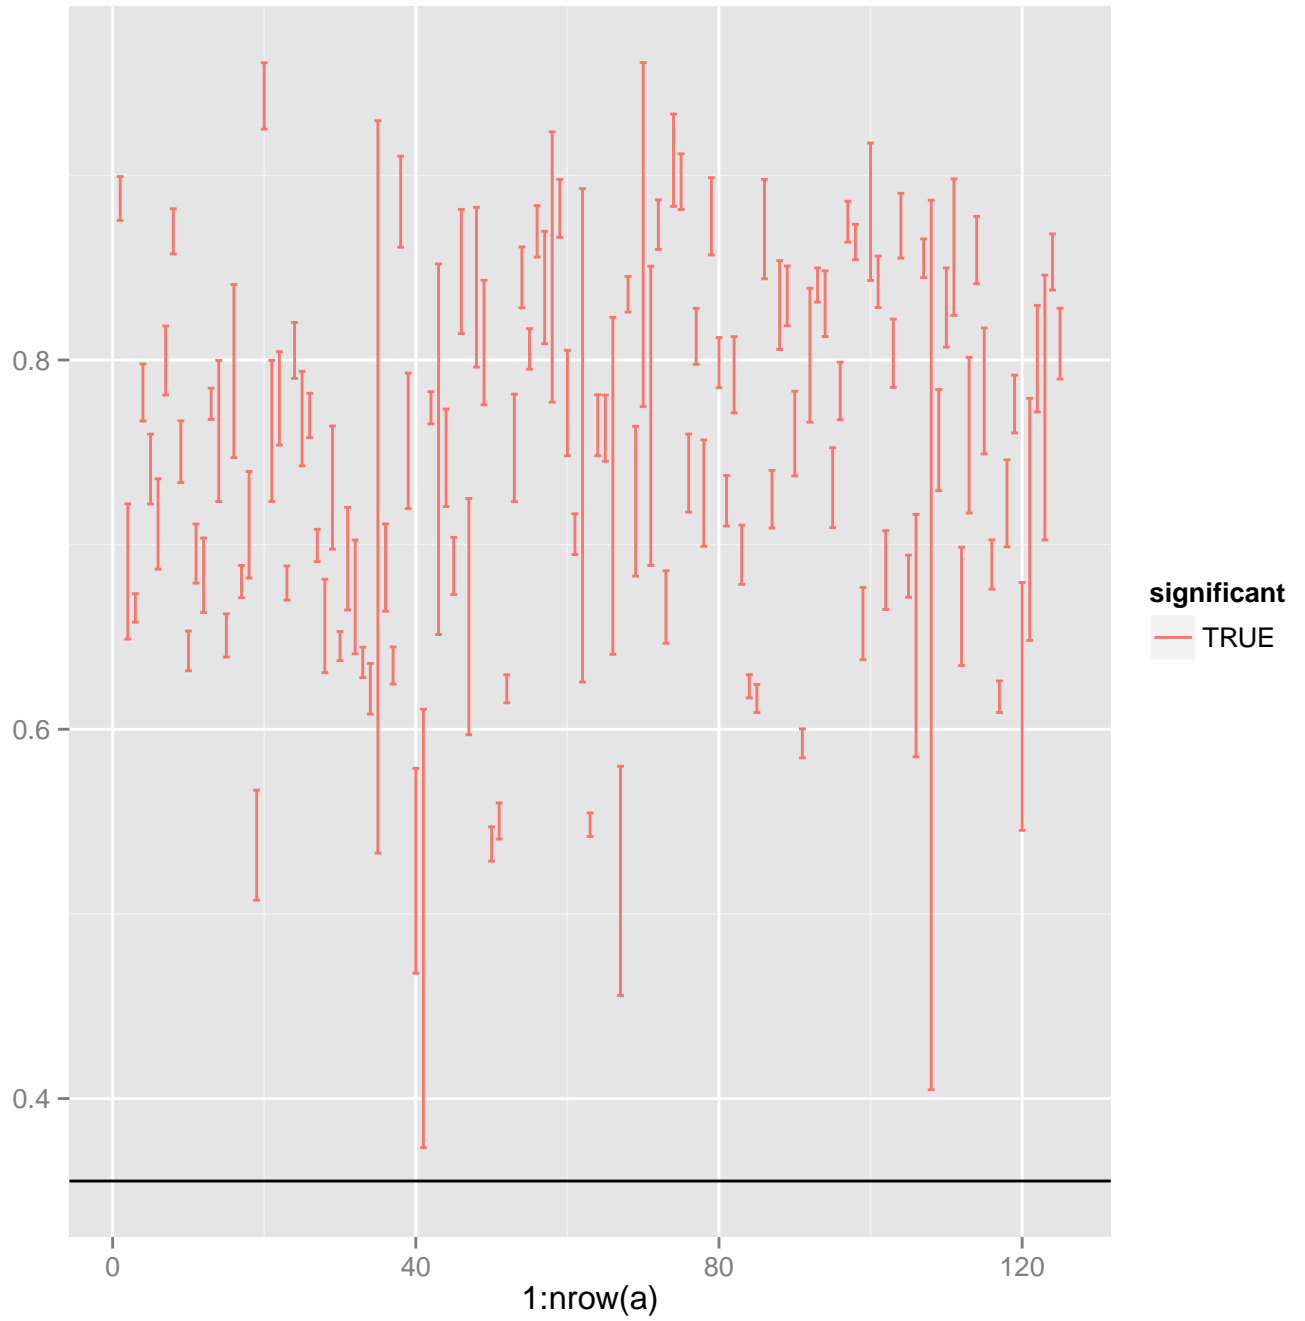

Figure 4: For each mouse celltype-factor pair we tested whether the SeqCons rate (of all TFos how many are SeqCons) is higher than expected by a Binomial test. The vertical lines show the estimated 99% confidence interval and the black line indicates the expected rate. The color of the vertical lines indicates whether the interval contains the expected value.

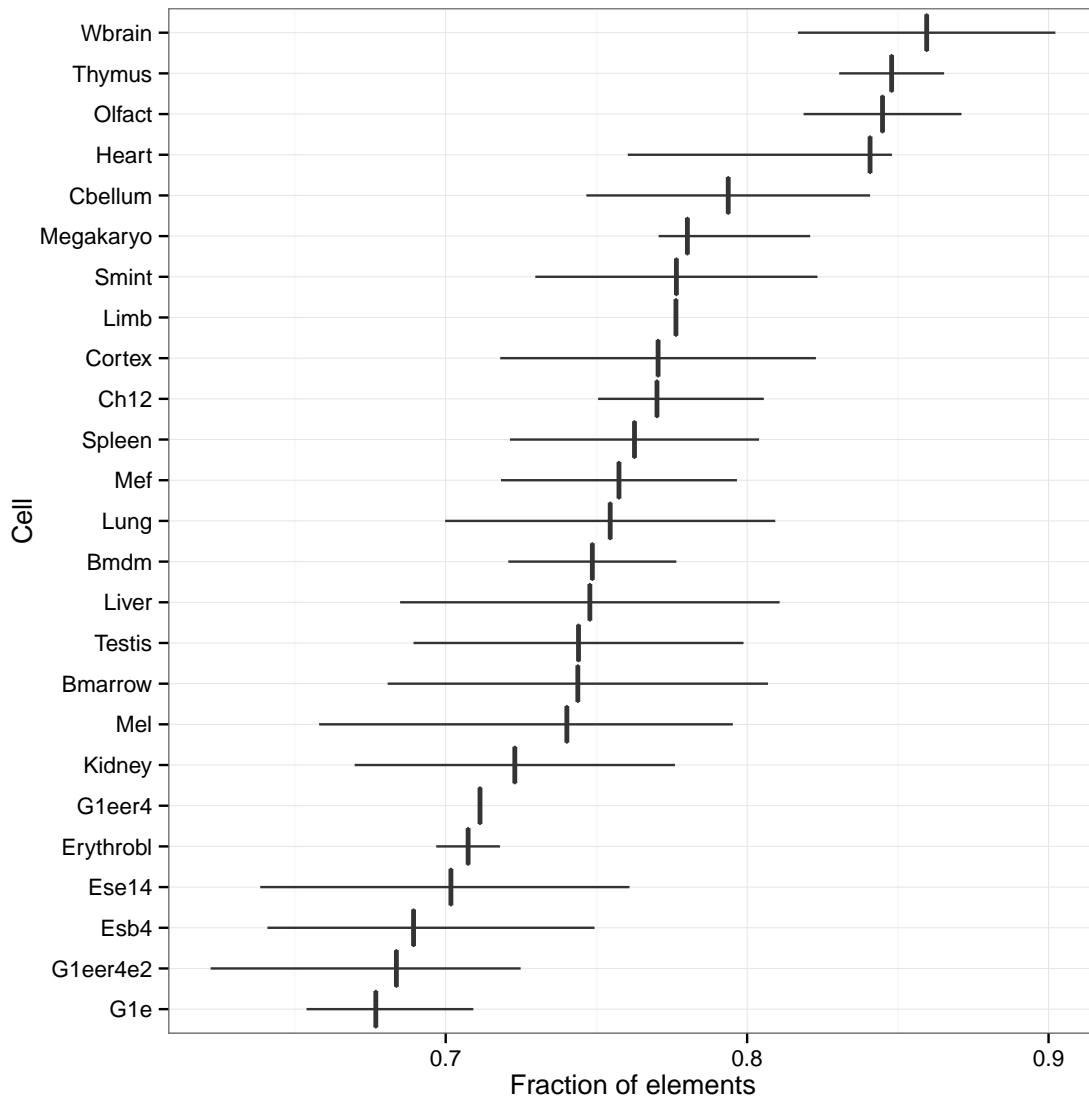

Figure 5: The distribution of *mouse* mappable TFos across *cell types*. The box-plot for each cell type summarizes the distribution of values for the fraction of elements that can be mapped on the other species. Occupied segments for each cell type contribute one value to the distribution.

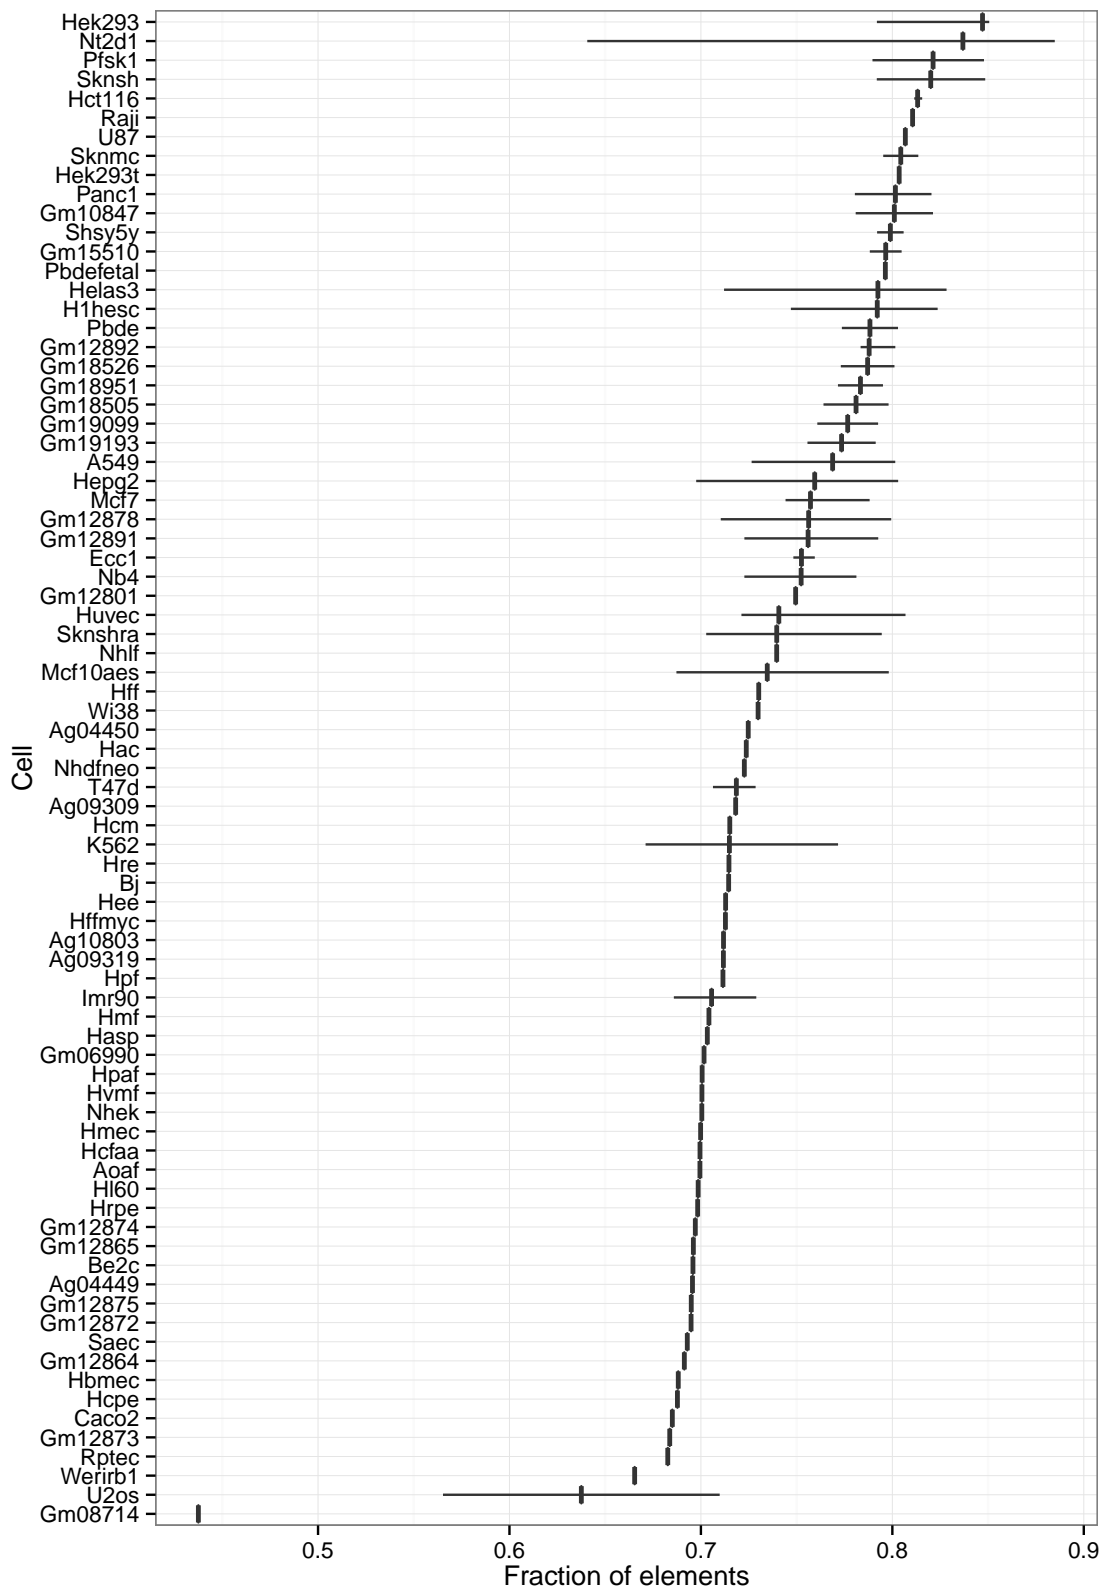

Figure 6: The distribution of *human* mappable TFs across *cell types*. The box-plot for each cell type summarizes the distribution of values for the fraction of elements that can be mapped on the other species.



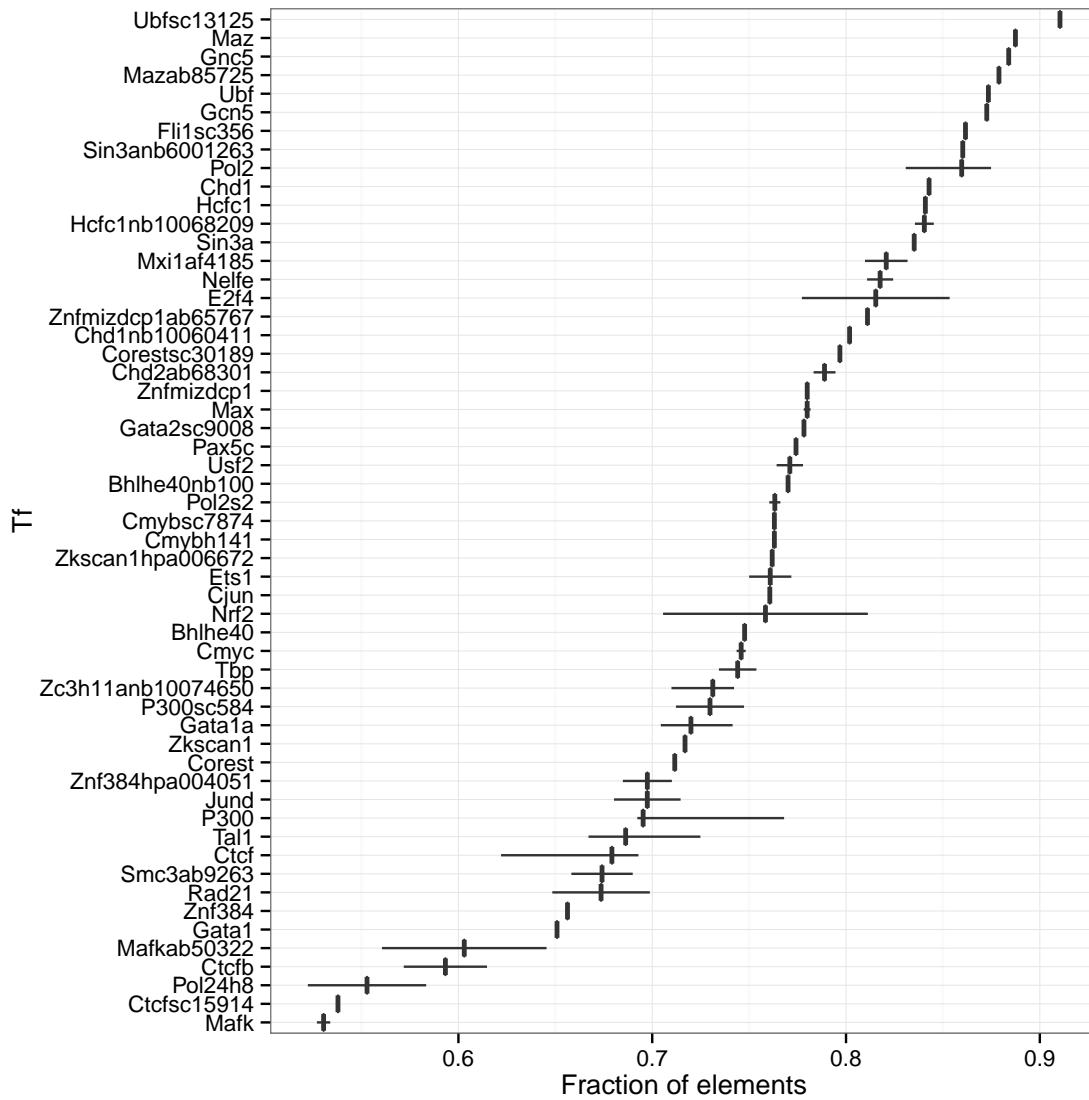

Figure 7: The distribution of *mouse* mappable TFs across *transcription factors*. The box-plot for each transcription factor summarizes the distribution of values for the fraction of elements that can be mapped on the other species.

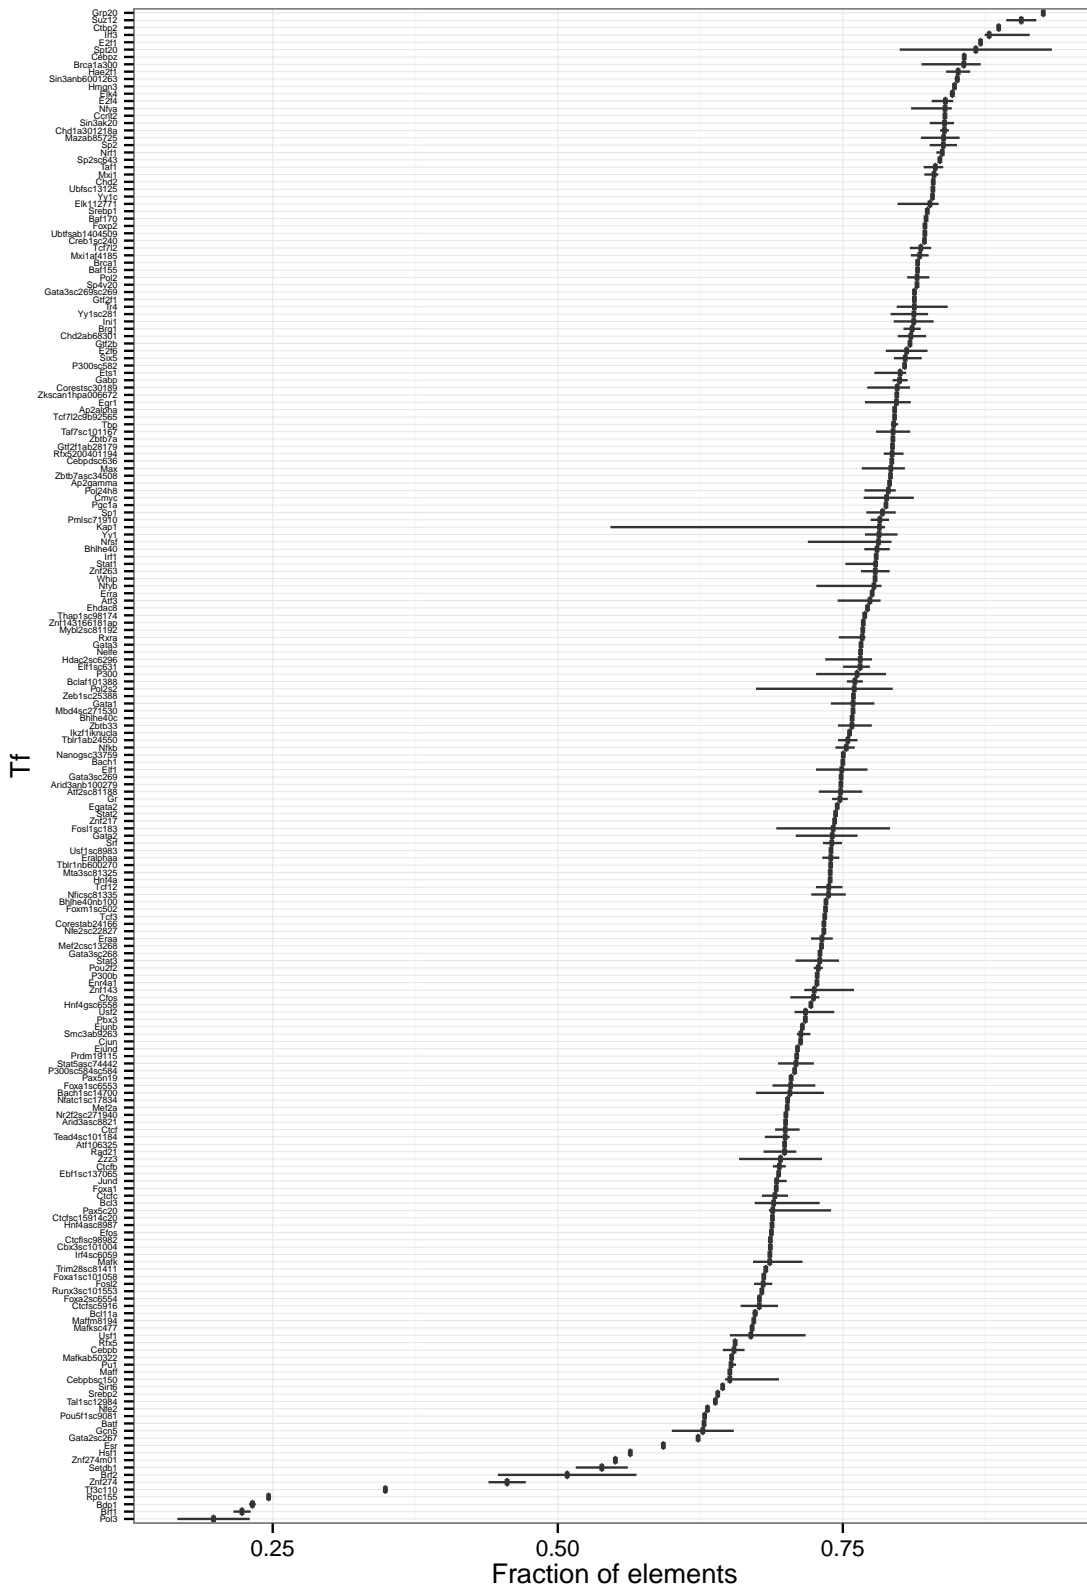

Figure 8: The distribution of *human* mappable TFs across *transcription factors*. The box-plot for each transcription factor summarizes the distribution of values for the fraction of elements that can be mapped on the other species.

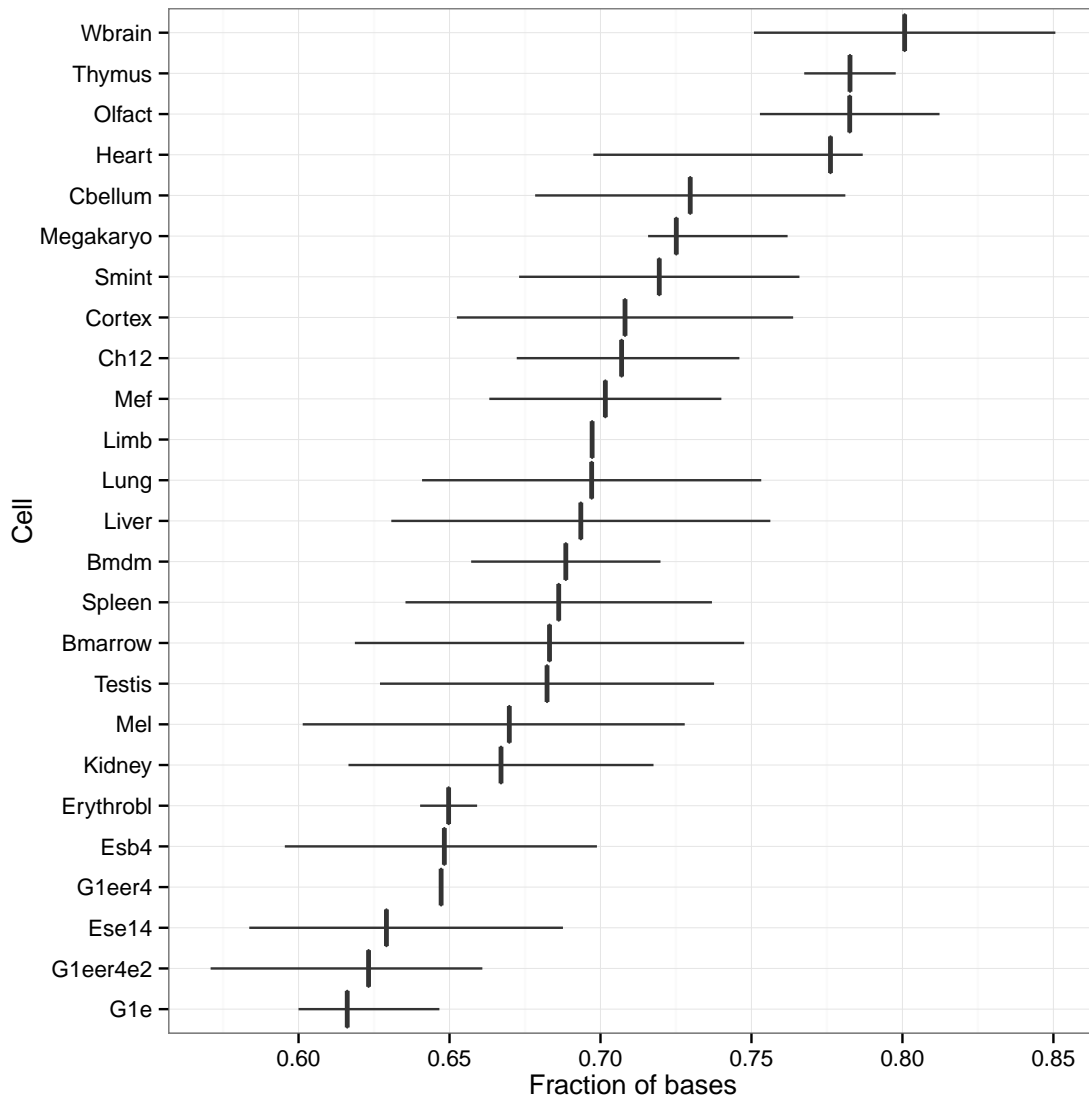

Figure 9: The distribution of *mouse* mappable TFos *nucleotides* across *cell types*. The box-plot for each cell type summarizes the distribution of values for the fraction of nucleotides that can be mapped on the other species.

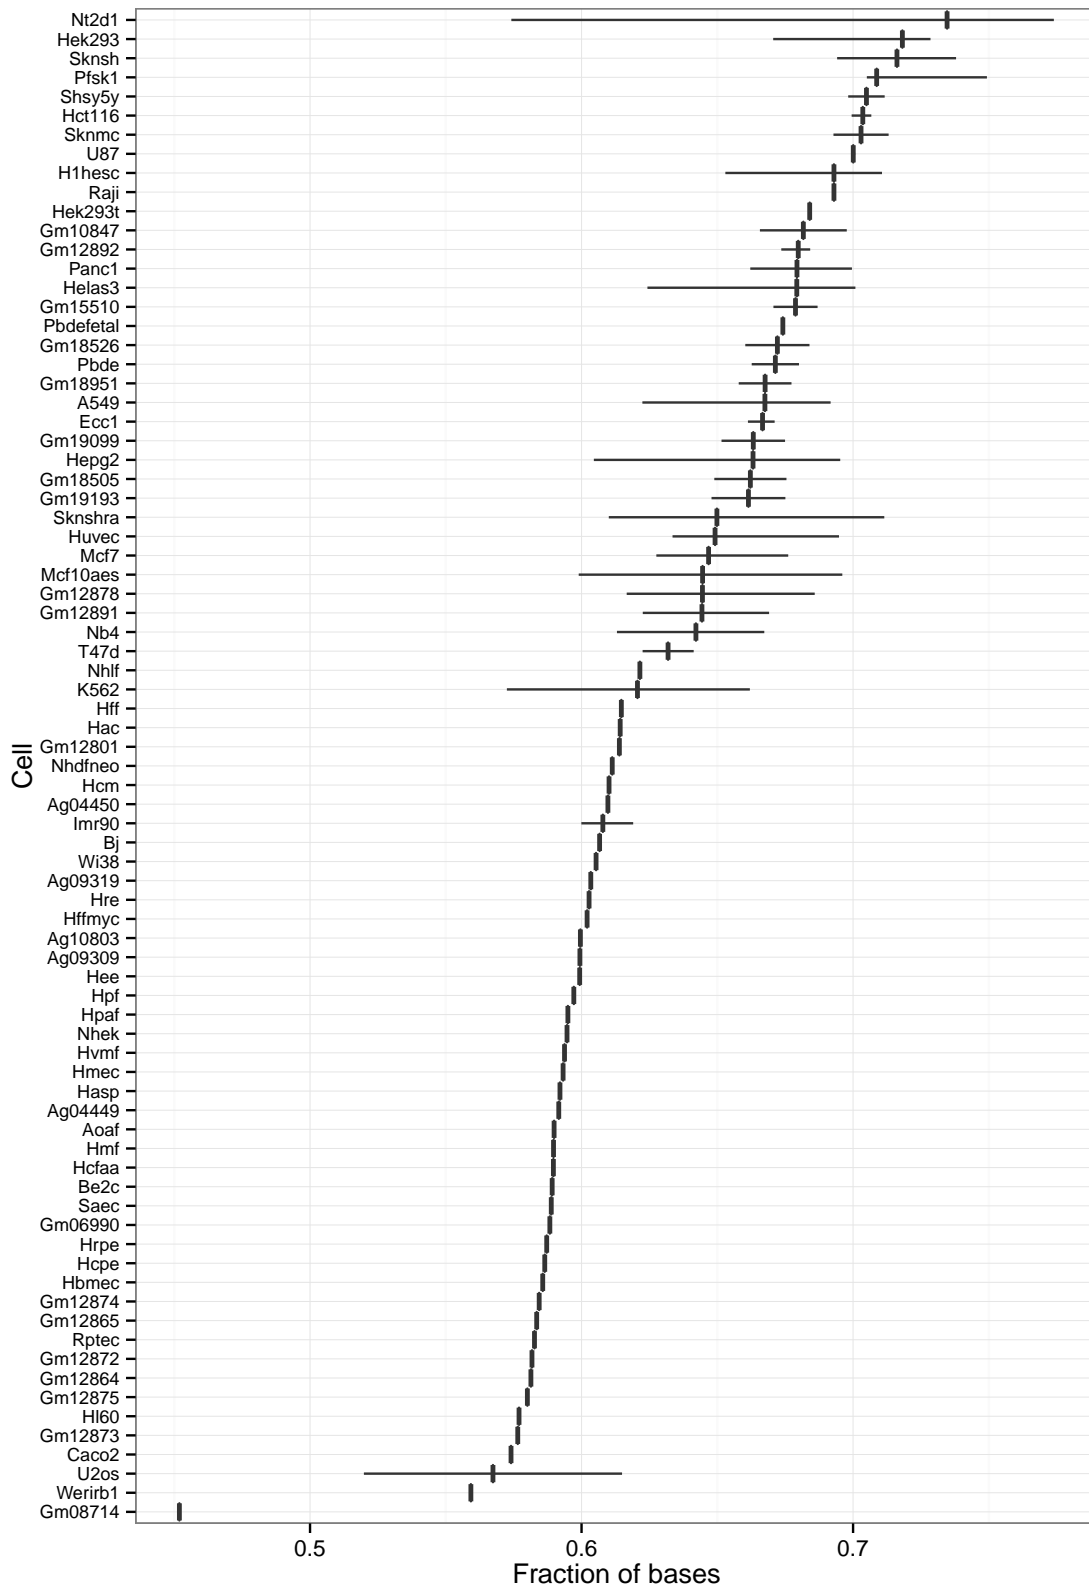

Figure 10: The distribution of *human* mappable TFos *nucleotides* across *cell types*. The box-plot for each cell type summarizes the distribution of values for the fraction of nucleotides that can be mapped on the other species.

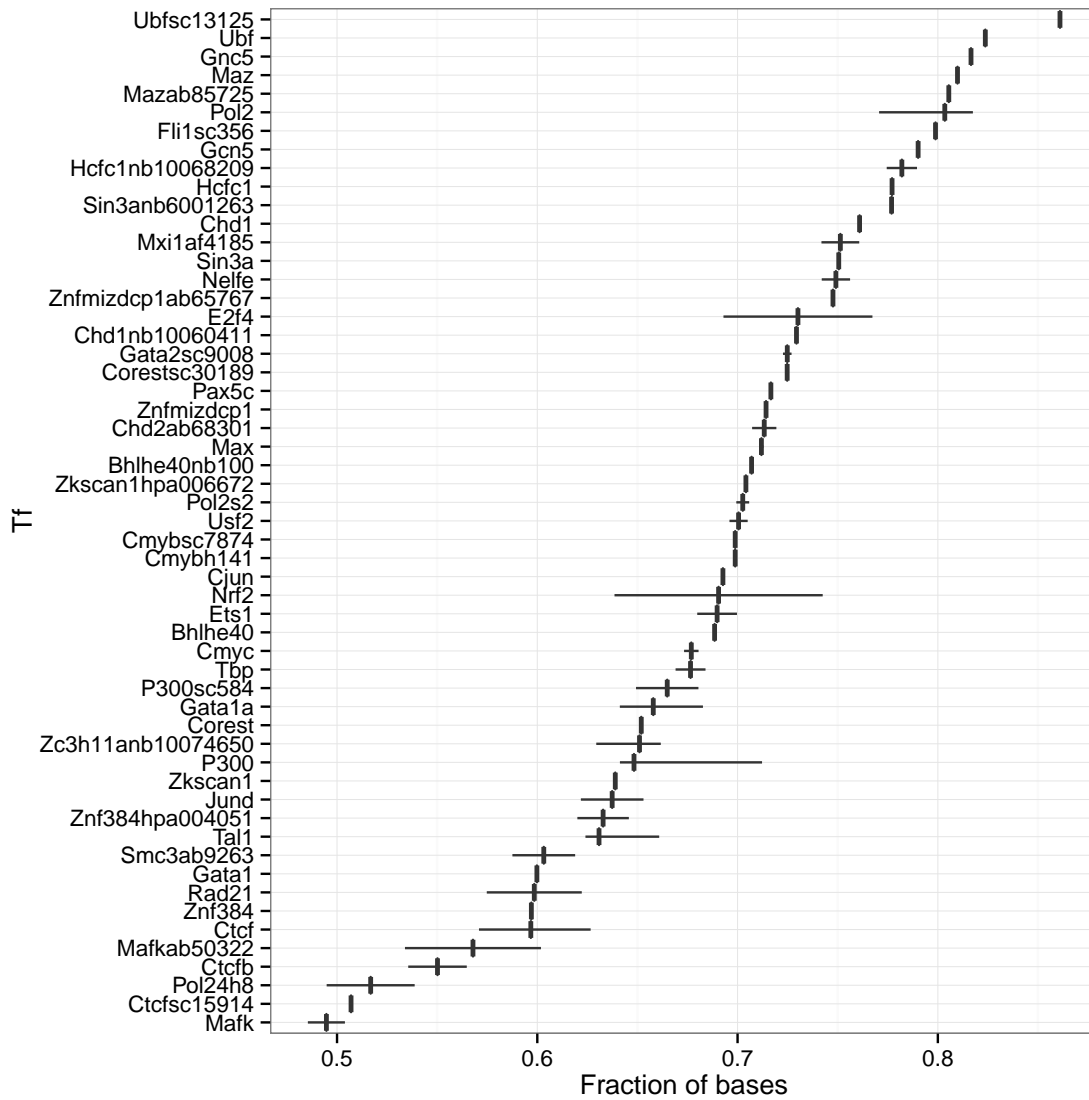

Figure 11: The distribution of *mouse* mappable TFs *nucleotides* across *transcription factors*. The box-plot for each cell type summarizes the distribution of values for the fraction of nucleotides that can be mapped on the other species.



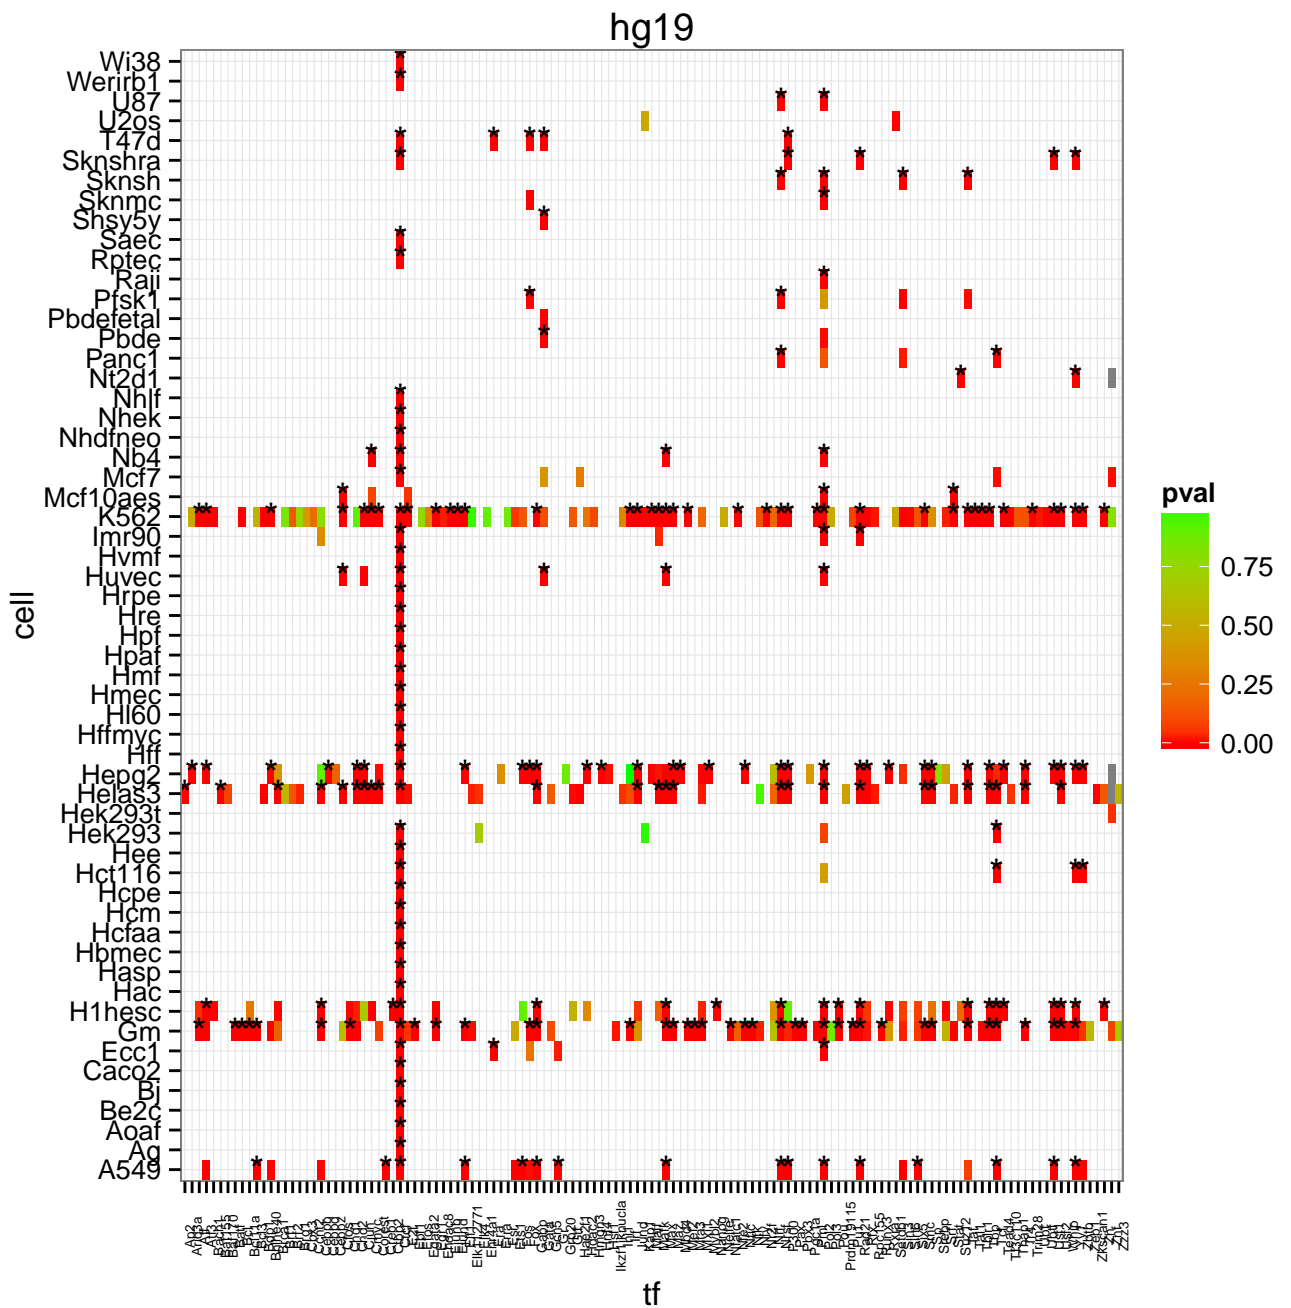

Figure 13: For each celltype-factor pair we tested whether the (log) binding signal over FunctCons or FunctActive elements was significantly different from that over SeqCons elements. Cases with a Bonferroni corrected error rate of 1% are marked with a '\*'; those for which there were not enough elements to perform the test are labeled with gray; white positions are missing data.

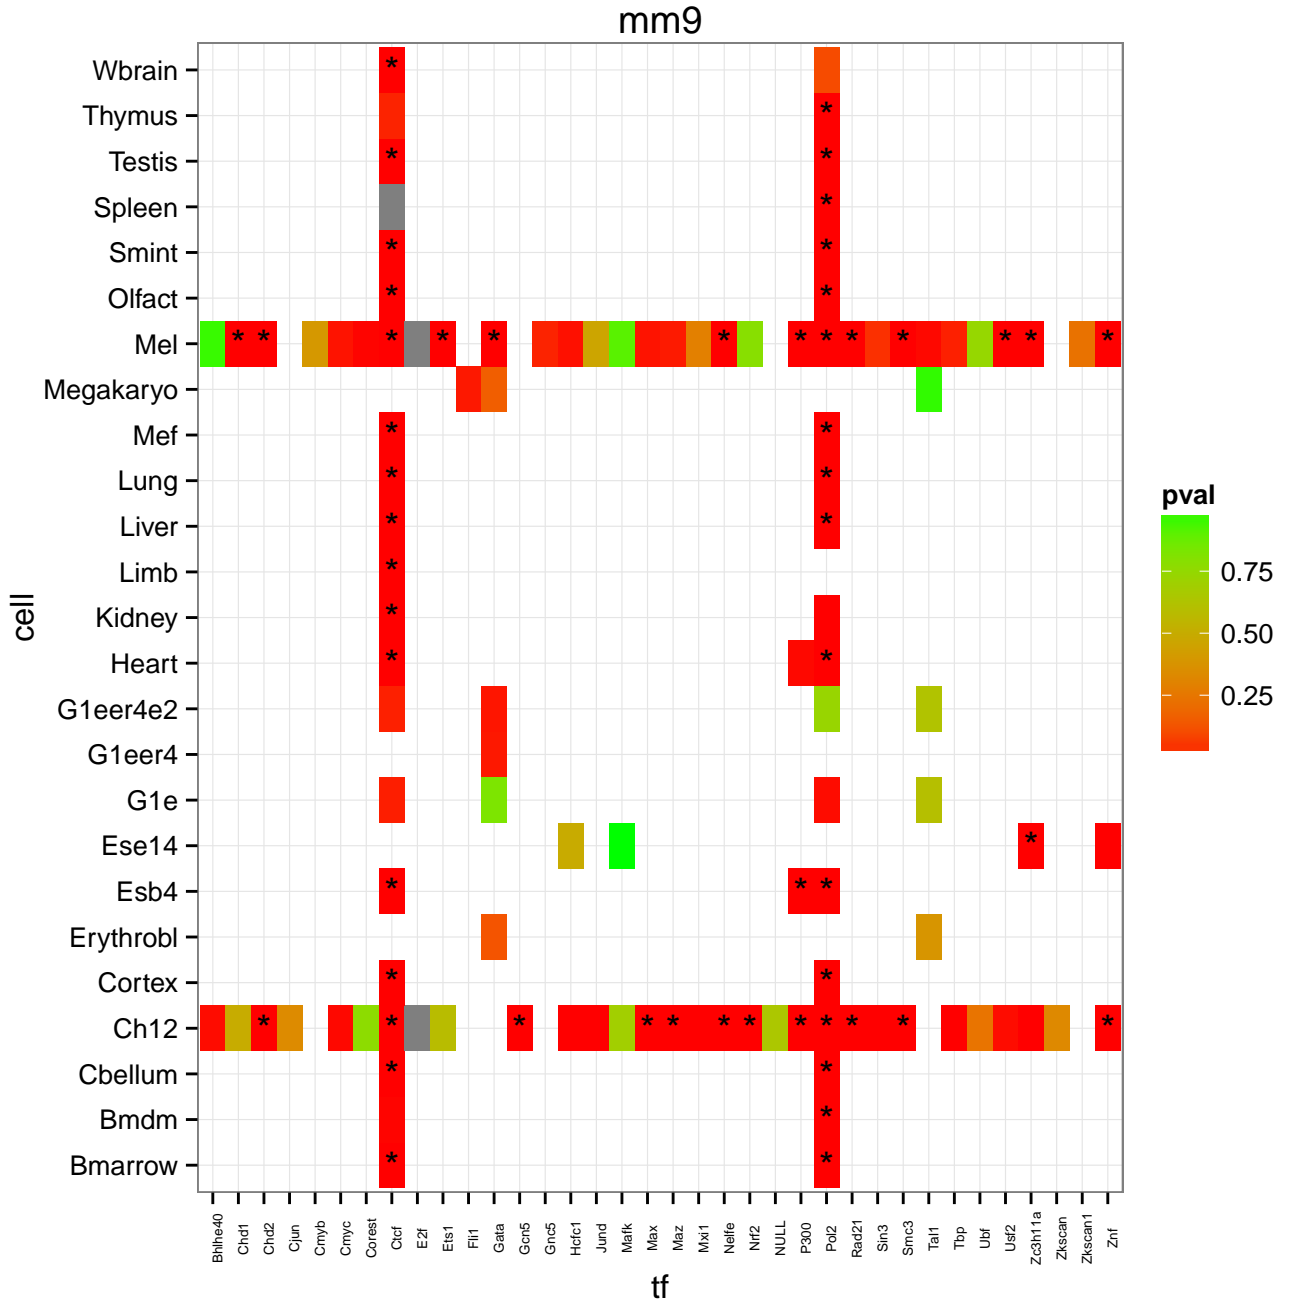

Figure 14: For each celltype-factor pair we tested whether the (log) binding signal over FunctCons or FunctActive elements was significantly different from that over SeqCons elements. Cases with a Bonferroni corrected error rate of 1% are marked with a '\*'; those for which there were not enough elements to perform the test are labeled with gray; white positions are missing data.



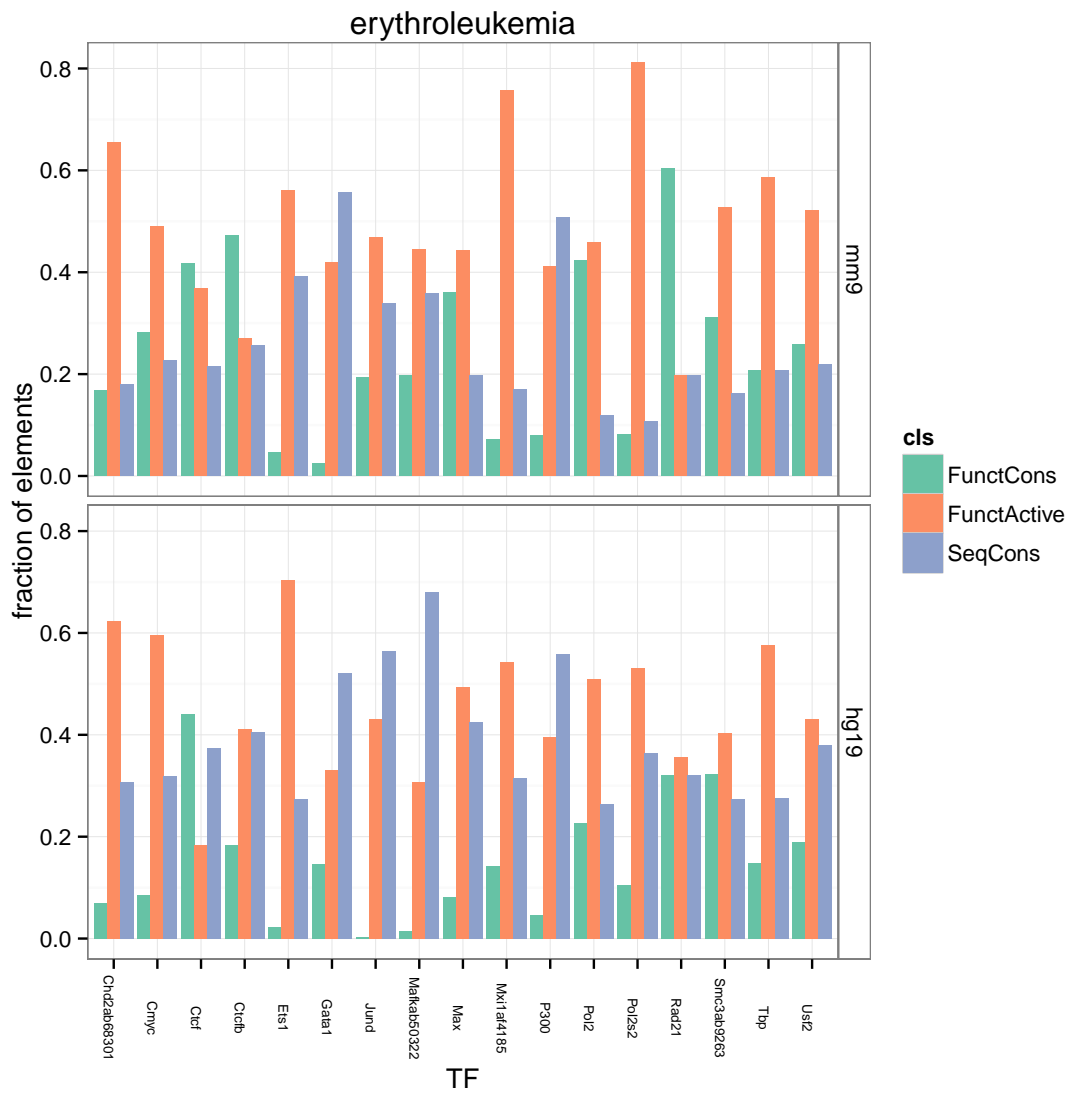

Figure 15: Classification of mappable elements for all three analogous cell types

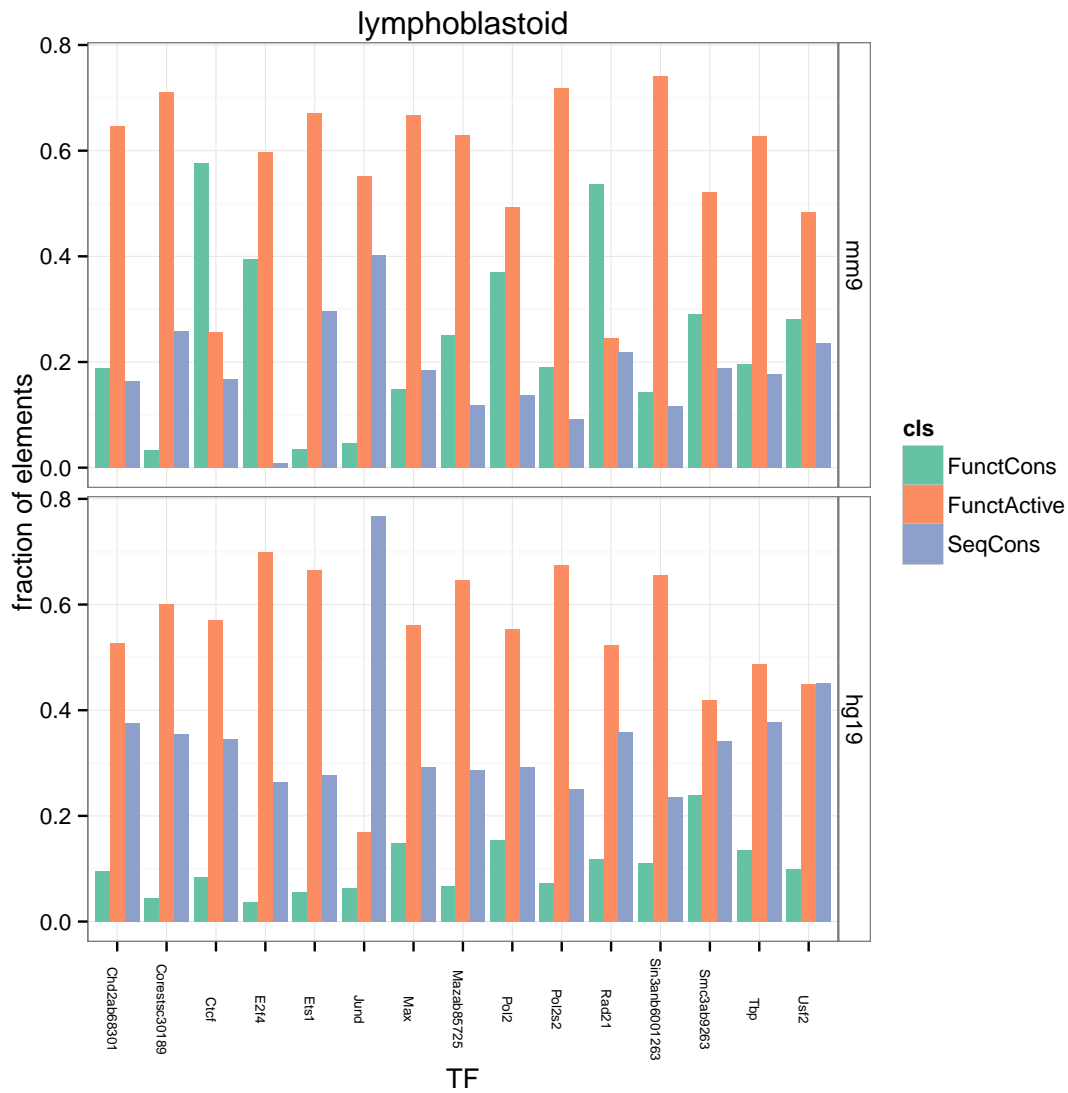

Figure 16: Classification of mappable elements for all three analogous cell types

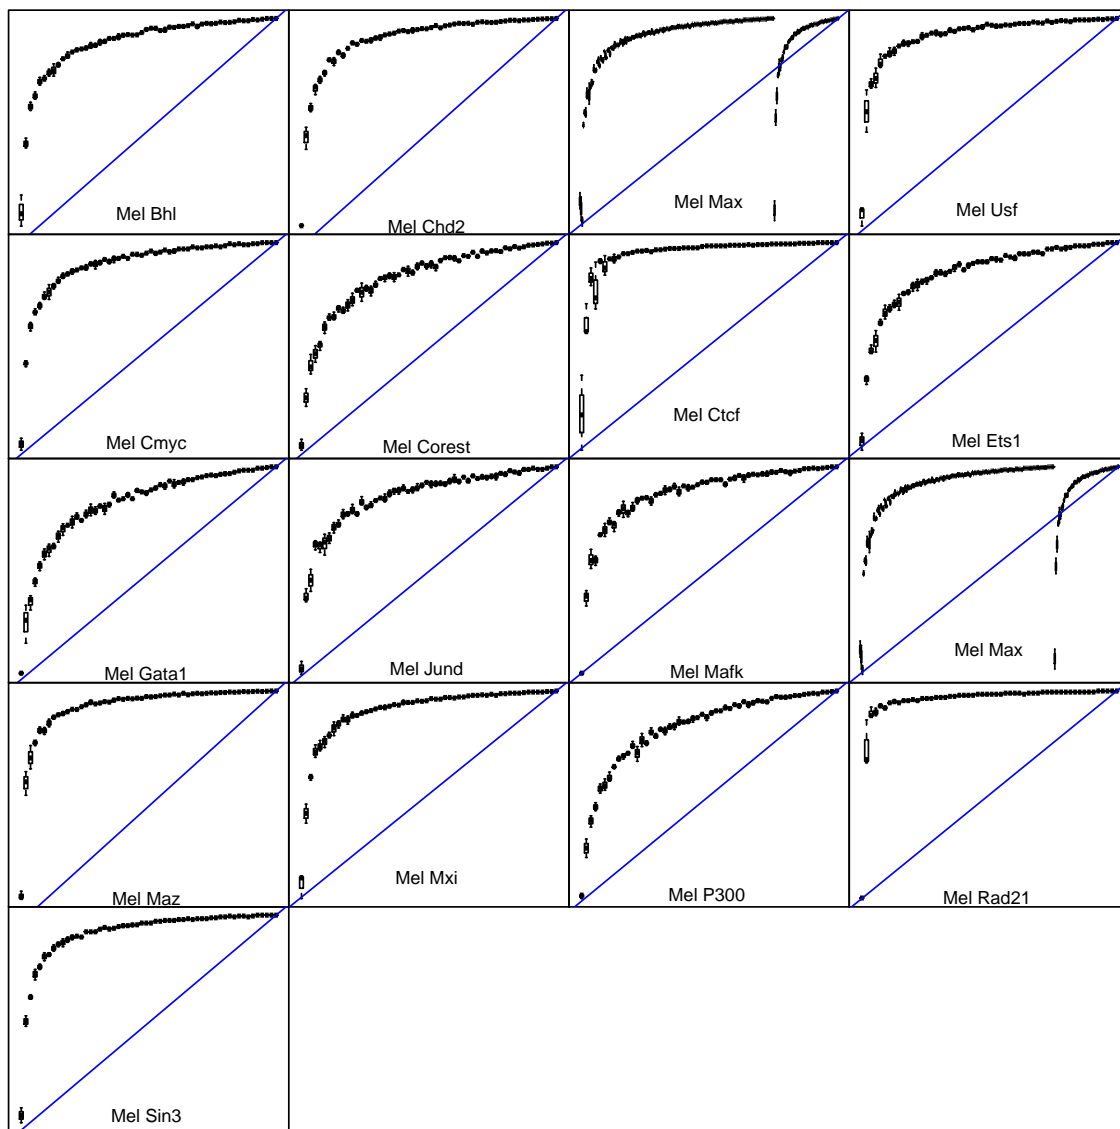

Figure 17: The plot shows the number of FunctActive elements from a query assay as a function of the subset size. We perform multiple countings for each number of assays from the other species

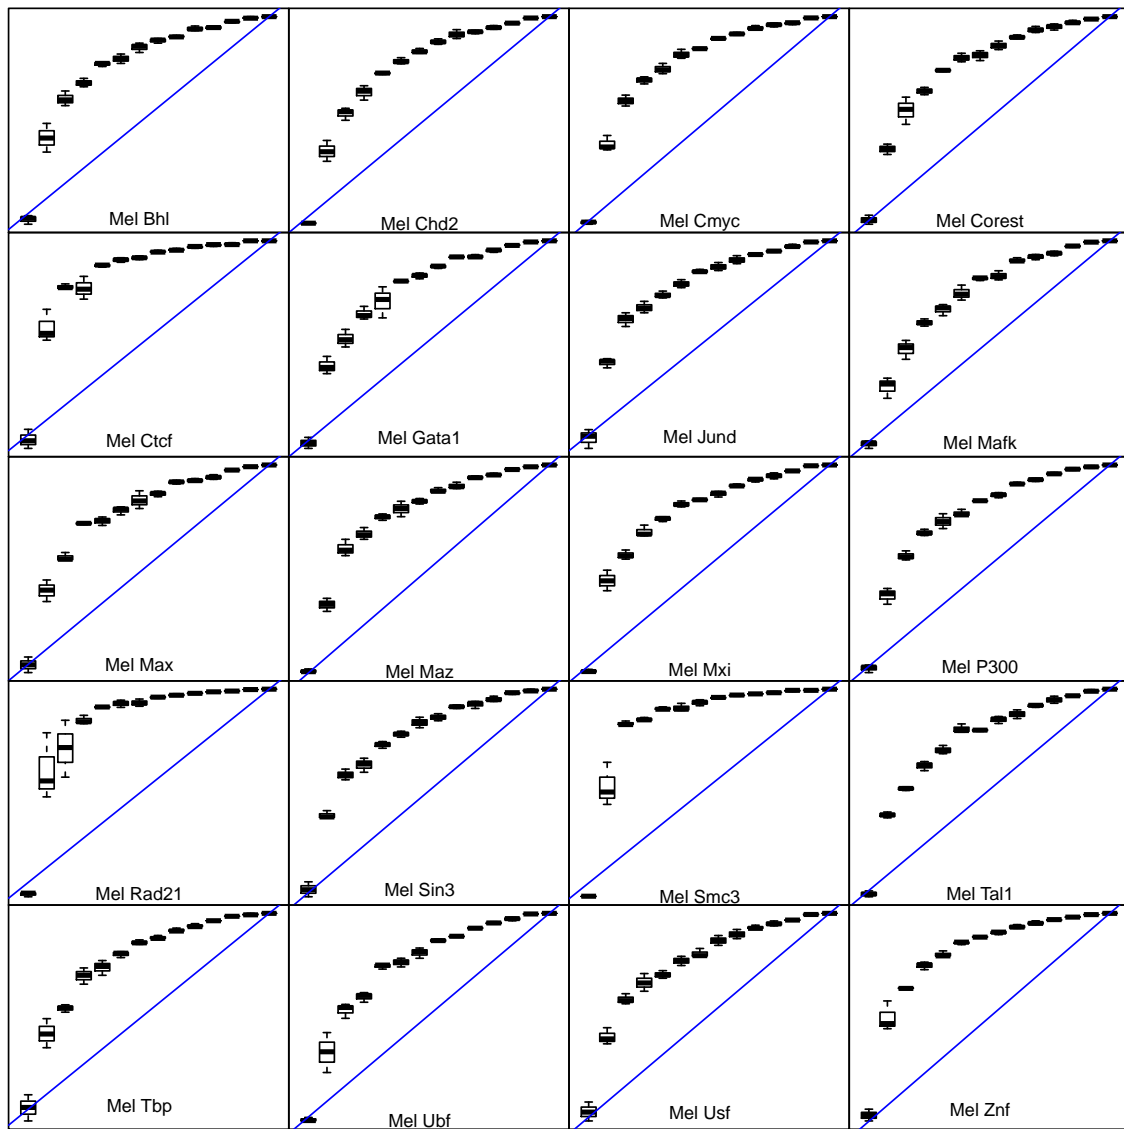

Figure 18: The plot shows the number of FunctActive elements from a query assay with respect to a subset of assays from the other species. We perform multiple countings for each number of assays from the other species

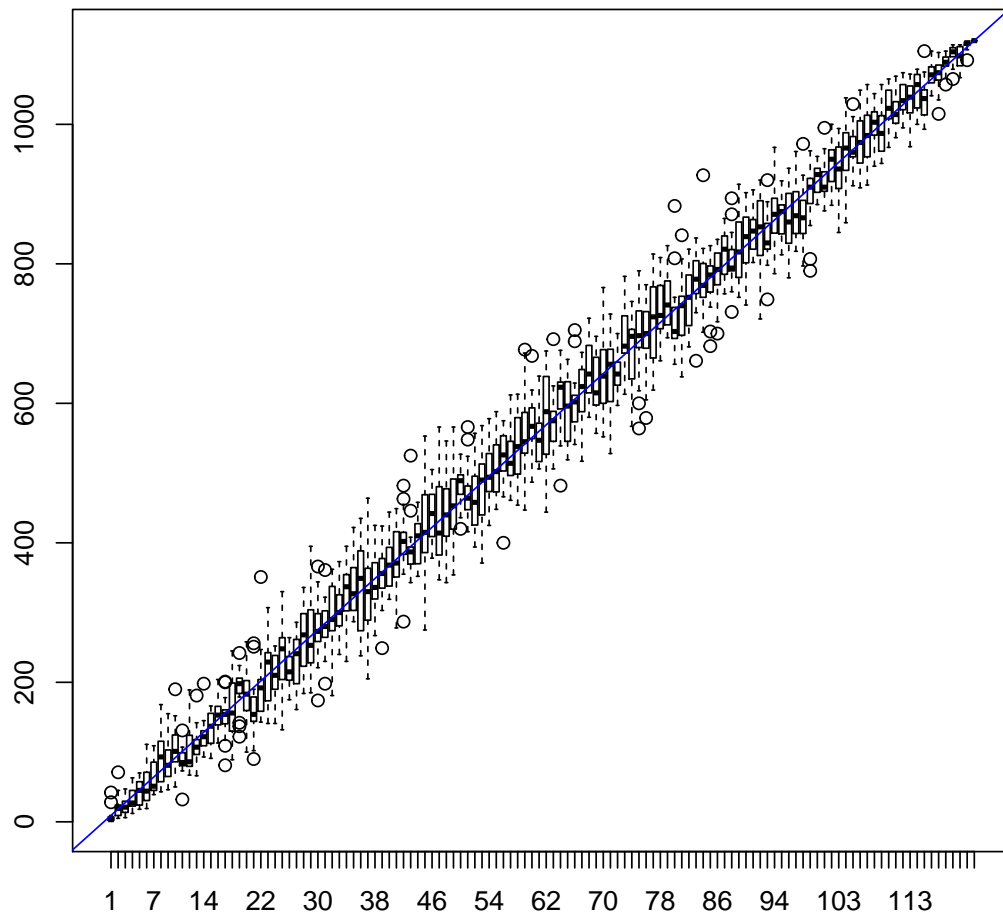

Figure 19: We modeled the situation of a set of assays that have no co-association, thus overlap with an exclusive set of TFs on the other species. The figure shows a simulation for 100 assays covering 1000 TFs on the other species such that the sets of covered TFs are pairwise disjoint. We perform multiple countings for each number of assays from the other species.

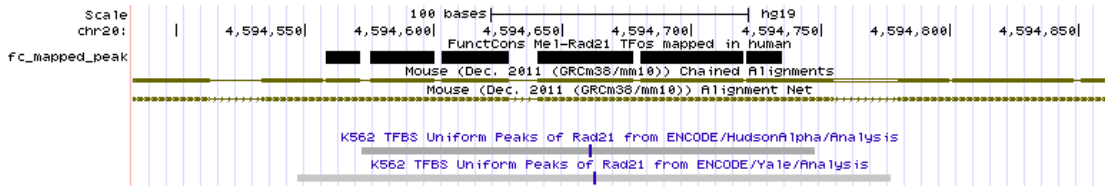

Figure 20: A mouse Rad21 occupancy site mapped on human chromosome 20. Mapping is guided by the human-mouse whole genome alignments which report 5 insertions in human. We classified this mouse TFos as FunctCons, as its mapped version in human overlaps with Rad21 occupancy sites in K562.

## 2 Supplementary tables

|                    | Min. | X1st.Qu. | Median | Mean  | X3rd.Qu. | Max.   |
|--------------------|------|----------|--------|-------|----------|--------|
| FunctActive (mm9)  | 5.4  | 38.3     | 74.0   | 131.1 | 164.5    | 7960.0 |
| FunctCons (mm9)    | 14.6 | 74.9     | 153.7  | 227.4 | 302.5    | 6875.0 |
| NonMapped (mm9)    | 5.4  | 41.2     | 83.1   | 135.2 | 174.9    | 8899.0 |
| SeqCons (mm9)      | 5.4  | 38.5     | 74.0   | 121.2 | 157.0    | 4958.0 |
| FunctActive (hg19) | 9.8  | 34.7     | 65.9   | 98.4  | 137.9    | 1370.0 |
| FunctCons (hg19)   | 14.1 | 41.3     | 77.9   | 98.6  | 139.1    | 829.9  |
| NonMapped (hg19)   | 9.8  | 33.1     | 59.5   | 85.6  | 114.1    | 1588.0 |
| SeqCons (hg19)     | 9.7  | 30.9     | 51.0   | 74.9  | 95.8     | 1239.0 |

Table 1: Peak signal statistics by peak classes

|    | Analogous cell pair (human, mouse) | Transcription factor |
|----|------------------------------------|----------------------|
| 1  | leuk (K562, Mel)                   | Gata1                |
| 2  | leuk (K562, Mel)                   | Pol2s2               |
| 3  | leuk (K562, Mel)                   | Usf2                 |
| 4  | leuk (K562, Mel)                   | Ctcfb                |
| 5  | leuk (K562, Mel)                   | Ets1                 |
| 6  | leuk (K562, Mel)                   | Tbp                  |
| 7  | leuk (K562, Mel)                   | Max                  |
| 8  | leuk (K562, Mel)                   | Mafkab50322          |
| 9  | leuk (K562, Mel)                   | Chd2ab68301          |
| 10 | leuk (K562, Mel)                   | P300                 |
| 11 | leuk (K562, Mel)                   | Jund                 |
| 12 | leuk (K562, Mel)                   | Smc3ab9263           |
| 13 | leuk (K562, Mel)                   | Mxi1af4185           |
| 14 | leuk (K562, Mel)                   | Ctcf                 |
| 15 | leuk (K562, Mel)                   | Cmyc                 |
| 16 | leuk (K562, Mel)                   | Rad21                |
| 17 | leuk (K562, Mel)                   | Pol2                 |
| 18 | lymph (Gm12878, Ch12)              | Pol2s2               |
| 19 | lymph (Gm12878, Ch12)              | Sin3anb6001263       |
| 20 | lymph (Gm12878, Ch12)              | Usf2                 |
| 21 | lymph (Gm12878, Ch12)              | Ets1                 |
| 22 | lymph (Gm12878, Ch12)              | Tbp                  |
| 23 | lymph (Gm12878, Ch12)              | Max                  |
| 24 | lymph (Gm12878, Ch12)              | Chd2ab68301          |
| 25 | lymph (Gm12878, Ch12)              | Jund                 |
| 26 | lymph (Gm12878, Ch12)              | Smc3ab9263           |
| 27 | lymph (Gm12878, Ch12)              | Corestsc30189        |
| 28 | lymph (Gm12878, Ch12)              | Mazab85725           |
| 29 | lymph (Gm12878, Ch12)              | E2f4                 |
| 30 | lymph (Gm12878, Ch12)              | Ctcf                 |
| 31 | lymph (Gm12878, Ch12)              | Rad21                |
| 32 | lymph (Gm12878, Ch12)              | Pol2                 |

Table 2: Analogous cells

|   | Species | Counting | Total Count | Function conserved | Sequence conserved |
|---|---------|----------|-------------|--------------------|--------------------|
| 1 | mm9     | elements | 727680      | 397846             | 503710             |
| 2 | hg19    | elements | 5330864     | 2065660            | 3850414            |
| 3 | mm9     | Mega-nt  | 32          | 16                 | 22                 |
| 4 | hg19    | Mega-nt  | 121         | 25                 | 83                 |

Table 3: Counts of mappable, functionally active, and total TFos. The table reports both the element count and the coverage in mega bases

|    | cell      | epo    | ucsc   | both   | species |
|----|-----------|--------|--------|--------|---------|
| 1  | Cbellum   | 13339  | 16961  | 12301  | mm9     |
| 2  | Erythrobl | 1472   | 1919   | 1370   | mm9     |
| 3  | Cortex    | 17450  | 21978  | 16072  | mm9     |
| 4  | Ch12      | 65349  | 84997  | 60454  | mm9     |
| 5  | Mel       | 111971 | 143033 | 102328 | mm9     |
| 6  | Bmarrow   | 13758  | 17662  | 12558  | mm9     |
| 7  | G1eer4e2  | 6610   | 8332   | 6007   | mm9     |
| 8  | Limb      | 10018  | 12634  | 9243   | mm9     |
| 9  | Heart     | 22077  | 28145  | 20571  | mm9     |
| 10 | G1eer4    | 7543   | 9520   | 6872   | mm9     |
| 11 | Ese14     | 3738   | 4795   | 3401   | mm9     |
| 12 | Wbrain    | 10163  | 12937  | 9416   | mm9     |
| 13 | Mef       | 15423  | 19776  | 14283  | mm9     |
| 14 | Lung      | 18262  | 23237  | 16796  | mm9     |
| 15 | Bmdm      | 1503   | 1944   | 1353   | mm9     |
| 16 | Testis    | 10113  | 12846  | 9209   | mm9     |
| 17 | Liver     | 16232  | 20546  | 14857  | mm9     |
| 18 | Spleen    | 1979   | 2770   | 1874   | mm9     |
| 19 | Smint     | 8595   | 11012  | 7880   | mm9     |
| 20 | Megakaryo | 633    | 850    | 603    | mm9     |
| 21 | Thymus    | 4530   | 6123   | 4234   | mm9     |
| 22 | G1e       | 10300  | 13041  | 9353   | mm9     |
| 23 | Olfact    | 3385   | 4535   | 3198   | mm9     |
| 24 | Kidney    | 14969  | 18594  | 13616  | mm9     |
| 25 | Esb4      | 18483  | 23375  | 16845  | mm9     |

Table 4: Number of TFos mapped by each alignment for select assays. An element can be mapped if it overlaps DHS elements and shared human mouse DNA by half of its length.



|    | cell     | epo    | ucsc   | both   | species |
|----|----------|--------|--------|--------|---------|
| 1  | A549     | 145435 | 192624 | 136593 | hg19    |
| 2  | Helas3   | 191883 | 257474 | 181513 | hg19    |
| 3  | Gm12878  | 323618 | 434881 | 303925 | hg19    |
| 4  | U2os     | 1085   | 1529   | 1013   | hg19    |
| 5  | H1hesc   | 179399 | 238861 | 168954 | hg19    |
| 6  | Pbde     | 5011   | 7039   | 4773   | hg19    |
| 7  | Mcf10aes | 182743 | 232988 | 171603 | hg19    |
| 8  | Gm12891  | 39863  | 54887  | 37533  | hg19    |
| 9  | Ecc1     | 28441  | 37530  | 26925  | hg19    |
| 10 | K562     | 424430 | 579307 | 398262 | hg19    |
| 11 | Hepg2    | 318167 | 423487 | 298333 | hg19    |
| 12 | Nb4      | 32771  | 44031  | 30571  | hg19    |
| 13 | Gm06990  | 12317  | 15951  | 11439  | hg19    |
| 14 | Huvec    | 51885  | 68268  | 49157  | hg19    |
| 15 | Gm12872  | 12756  | 16409  | 11787  | hg19    |
| 16 | Wi38     | 5526   | 7106   | 5123   | hg19    |
| 17 | T47d     | 35984  | 46540  | 33810  | hg19    |
| 18 | Mcf7     | 23622  | 31147  | 22094  | hg19    |
| 19 | Hcm      | 11542  | 14928  | 10751  | hg19    |
| 20 | Hasp     | 16039  | 20502  | 14901  | hg19    |
| 21 | Nhek     | 10680  | 13814  | 9941   | hg19    |
| 22 | Hpaf     | 16072  | 20530  | 14939  | hg19    |
| 23 | Hmf      | 16625  | 21272  | 15498  | hg19    |
| 24 | Hct116   | 33158  | 45045  | 31284  | hg19    |
| 25 | Pfsk1    | 11124  | 15420  | 10651  | hg19    |
| 26 | Gm12892  | 25328  | 36539  | 24239  | hg19    |
| 27 | Hek293   | 25114  | 33422  | 23552  | hg19    |
| 28 | H160     | 4840   | 6146   | 4455   | hg19    |
| 29 | Rptec    | 14744  | 18840  | 13675  | hg19    |
| 30 | Panc1    | 7341   | 10445  | 7004   | hg19    |
| 31 | Imr90    | 62159  | 79214  | 58040  | hg19    |
| 32 | Hee      | 12157  | 15463  | 11285  | hg19    |
| 33 | Caco2    | 18754  | 23826  | 17375  | hg19    |
| 34 | Hek293t  | 4898   | 6799   | 4695   | hg19    |
| 35 | Hffmyc   | 8425   | 10735  | 7806   | hg19    |
| 36 | Ag09319  | 16126  | 20650  | 15035  | hg19    |
| 37 | Sknshra  | 88506  | 113500 | 83167  | hg19    |
| 38 | Be2c     | 14342  | 18389  | 13315  | hg19    |
| 39 | Nhlf     | 10561  | 13521  | 9825   | hg19    |
| 40 | Sknsh    | 115218 | 149442 | 108746 | hg19    |
| 41 | Hrpe     | 18594  | 23642  | 17257  | hg19    |
| 42 | Gm15510  | 7589   | 10884  | 7242   | hg19    |
| 43 | Werirb1  | 19255  | 24568  | 17815  | hg19    |
| 44 | Gm12864  | 13074  | 16900  | 12118  | hg19    |
| 45 | Hbmec    | 17228  | 22036  | 15998  | hg19    |
| 46 | Saec     | 14583  | 18802  | 13537  | hg19    |
| 47 | Aoaf     | 19868  | 25343  | 18479  | hg19    |
| 48 | Gm18526  | 5204   | 7519   | 4981   | hg19    |
| 49 | Gm12865  | 14135  | 18284  | 13104  | hg19    |
| 50 | Gm18951  | 8262   | 11677  | 7868   | hg19    |

Table 5: Number of TFos mapped by each alignment for select assays. An element can be mapped if it overlaps DHS elements and shared human mouse DNA by half of its length. Continues ...

|    | cell      | epo   | ucsc  | both  | species |
|----|-----------|-------|-------|-------|---------|
| 51 | Nt2d1     | 2431  | 3320  | 2382  | hg19    |
| 52 | Gm19099   | 7419  | 10467 | 7078  | hg19    |
| 53 | Gm18505   | 6578  | 9431  | 6282  | hg19    |
| 54 | Hmec      | 18667 | 24058 | 17411 | hg19    |
| 55 | Nhdfneo   | 12788 | 16358 | 11901 | hg19    |
| 56 | Sknmc     | 8670  | 11862 | 8255  | hg19    |
| 57 | Hvmf      | 12829 | 16426 | 11886 | hg19    |
| 58 | Bj        | 13007 | 16754 | 12095 | hg19    |
| 59 | Hpf       | 15975 | 20473 | 14891 | hg19    |
| 60 | Hcpe      | 18749 | 23982 | 17440 | hg19    |
| 61 | Raji      | 4356  | 6256  | 4145  | hg19    |
| 62 | Hac       | 11025 | 14109 | 10283 | hg19    |
| 63 | Ag04450   | 13815 | 17771 | 12862 | hg19    |
| 64 | Hcfaa     | 14202 | 18203 | 13216 | hg19    |
| 65 | Hre       | 13388 | 17115 | 12457 | hg19    |
| 66 | Gm10847   | 4313  | 6156  | 4121  | hg19    |
| 67 | Ag04449   | 24796 | 31787 | 23088 | hg19    |
| 68 | U87       | 8224  | 11328 | 7859  | hg19    |
| 69 | Ag10803   | 17574 | 22431 | 16350 | hg19    |
| 70 | Shsy5y    | 4937  | 6263  | 4720  | hg19    |
| 71 | Gm12875   | 12409 | 16123 | 11517 | hg19    |
| 72 | Gm19193   | 6284  | 9018  | 6028  | hg19    |
| 73 | Gm12801   | 862   | 1089  | 797   | hg19    |
| 74 | Gm08714   | 1     | 7     | 1     | hg19    |
| 75 | Pbdefetal | 258   | 348   | 248   | hg19    |
| 76 | Gm12873   | 14378 | 18541 | 13320 | hg19    |
| 77 | Hff       | 17984 | 22979 | 16688 | hg19    |
| 78 | Gm12874   | 12534 | 16237 | 11610 | hg19    |
| 79 | Ag09309   | 11504 | 14748 | 10680 | hg19    |

Table 6: Number of TFos mapped by each alignment for select assays. An element can be mapped if it overlaps DHS elements and shared human mouse DNA by half of its length.
